# Supplementary material
Source: MDPI journal article supplement (https://www.mdpi.com/2079-9276/13/4/52)
Supplement: s1 [file s1]

# The Circularity of Materials from the Perspective of the Product Life Cycle: A Case Study of Secondary Fence Board, Part 2 (Scenario Analysis)

Joanna Kulczycka <sup>1</sup>, Anna Lewandowska <sup>2</sup>, Katarzyna Joachimiak-Lechman <sup>2,\*</sup> and Przemysław Kurczewski <sup>3</sup>

<sup>1</sup> Mineral and Energy Economy Research Institute, Polish Academy of Sciences, 31-261 Krakow, Poland; kulczycka@meeri.pl

<sup>2</sup> Institute of Management, Poznan University of Economics and Business, 61-875 Poznan, Poland;  
anna.lewandowska@ue.poznan.pl

<sup>3</sup> Faculty of Civil and Transport Engineering, Poznan University of Technology, 60-965 Poznan, Poland;  
przemyslaw.kurczewski@put.poznan.pl

\* Correspondence: katarzyna.joachimiak-lechman@ue.poznan.pl; Tel.: +48-61-854-31-21

**Life cycle of multi-material packaging** (\*HDPE = 30%; PP = 30%; PC = 10%; PA = 10%; ABS = 10%; ALU = 10%)  
**Function provided** → contain and protect the product; enable its transport and storage

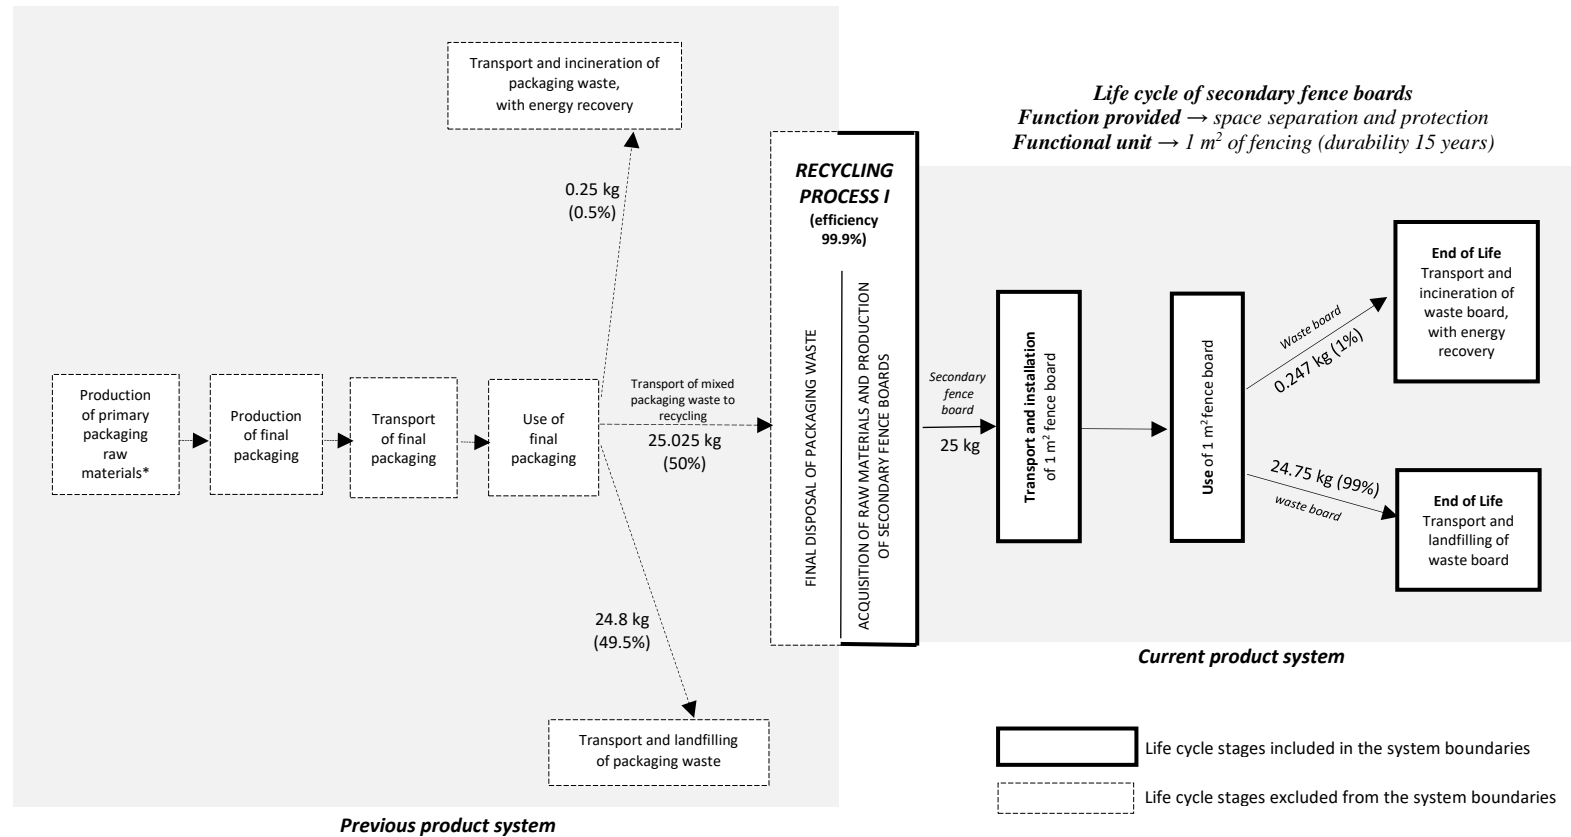

**Figure S1.** System boundaries in the scenarios 1A (baseline), 2A, 3A and 4A

**Life cycle of multi-material packaging** (\*HDPE = 30%; PP = 30%; PC = 10%; PA = 10%; ABS = 10%; ALU = 10%)

**Function provided** → contain and protect the product; enable its transport and storage

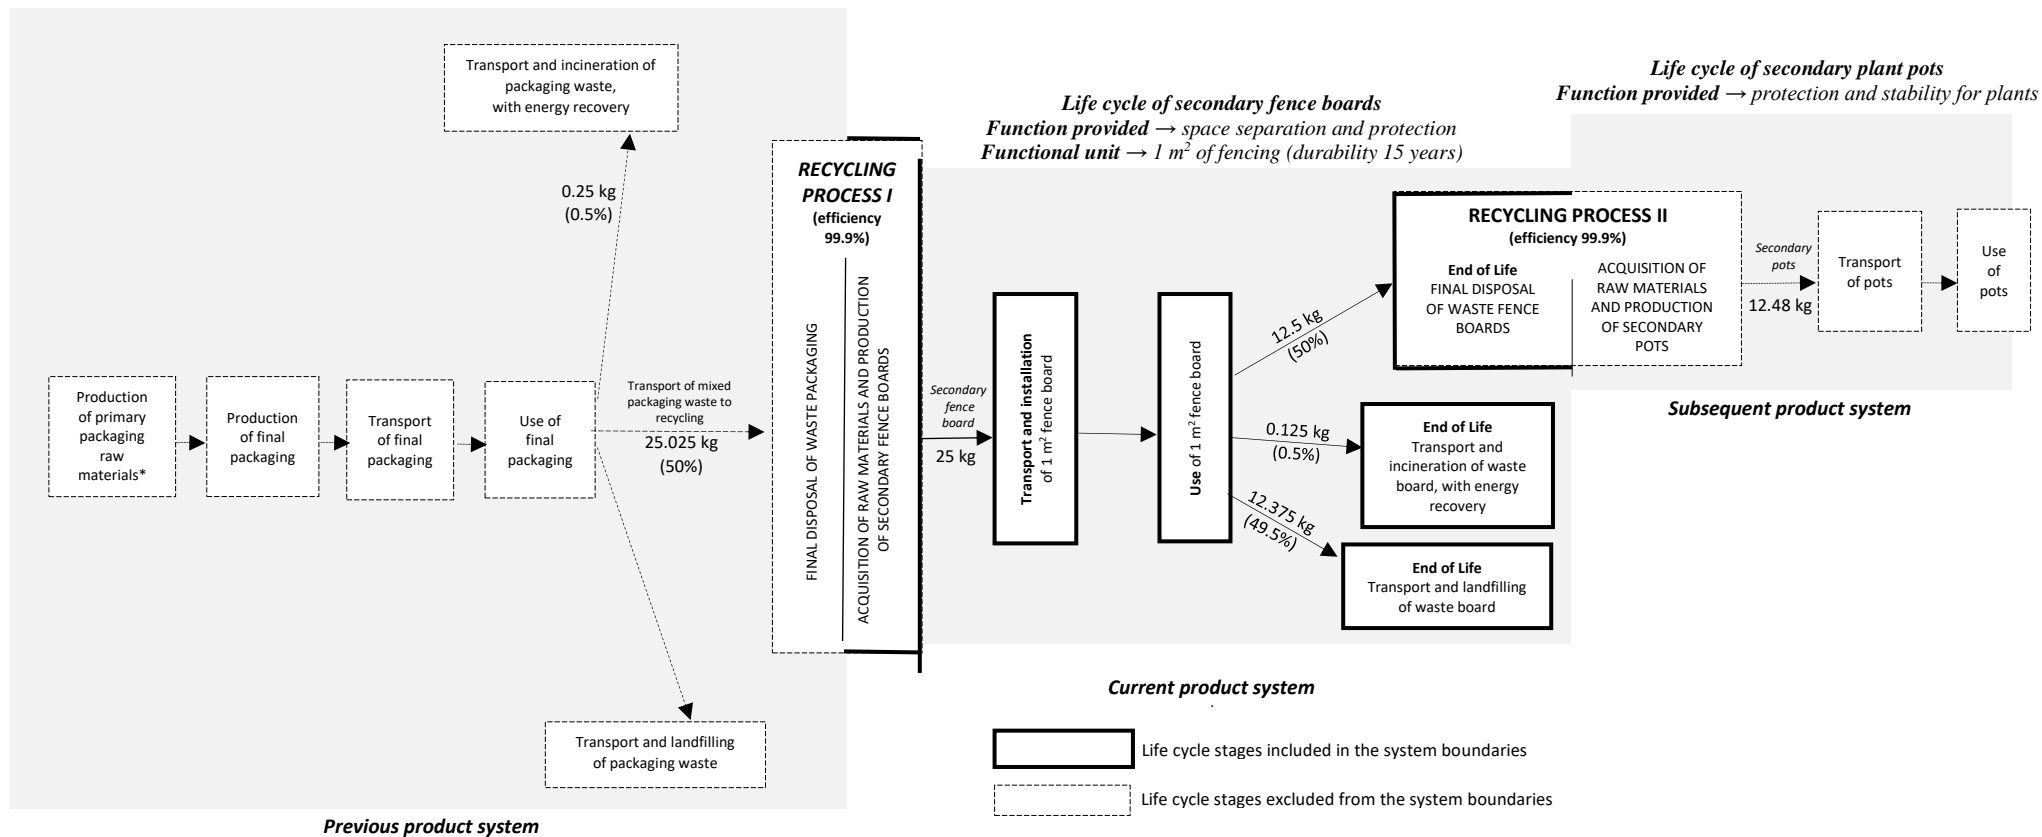

**Figure S2.** System boundaries in scenarios with options B, C and D

**Table S1.** Recycling at the cradle ( $E_{\text{recycled}}$ ) and substitution modelling options for primary production ( $E_v$ ), results per functional unit (1 m<sup>2</sup> of secondary fence board)

|                                                                                                 | SUBSTITUTION MODELLING OPTIONS – RECYCLING AT THE CRADLE                                                                                                                                             |                                                                                                                                                             |                                                                                                                                                       |   |
|-------------------------------------------------------------------------------------------------|------------------------------------------------------------------------------------------------------------------------------------------------------------------------------------------------------|-------------------------------------------------------------------------------------------------------------------------------------------------------------|-------------------------------------------------------------------------------------------------------------------------------------------------------|---|
|                                                                                                 | 1                                                                                                                                                                                                    | 2                                                                                                                                                           | 3                                                                                                                                                     | 4 |
| Recycled content $R_1$                                                                          | $R_1 = 1$                                                                                                                                                                                            |                                                                                                                                                             |                                                                                                                                                       |   |
| Recycling at the cradle $E_{\text{recycled}}$                                                   | Recycling Process I                                                                                                                                                                                  |                                                                                                                                                             |                                                                                                                                                       |   |
| Functions provided by Recycling Process I                                                       | <ul style="list-style-type: none"><li>• Treatment of multi-material packaging waste</li><li>• Production of secondary fence board (final product)</li></ul>                                          |                                                                                                                                                             |                                                                                                                                                       |   |
| Output of Recycling process I (per FU, 1 m <sup>2</sup> of fencing)                             | <ul style="list-style-type: none"><li>• Treated 25.025 kg of packaging waste</li><li>• 1 m<sup>2</sup> (25 kg) of secondary fence board with durability of 15 years</li></ul>                        |                                                                                                                                                             |                                                                                                                                                       |   |
| The market affected by using recycled materials in the recycled product (secondary fence board) | Packaging market                                                                                                                                                                                     | Fencing market                                                                                                                                              |                                                                                                                                                       |   |
| Reasons why the market is affected                                                              | Production of primary packaging materials potentially increased because of the unavailability of the recycled materials already used in the secondary fence board and absorbed by the fencing market | Production of primary fencing materials potentially increased because of unavailability of the recycled materials already used in the secondary fence board |                                                                                                                                                       |   |
| The primary production ( $E_v$ )                                                                | Production of primary packaging materials, mix based on the waste composition<br><br>(HDPE = 30%, PP = 30%, PC= 10%, PA = 10%, ABS = 10%, aluminium                                                  | Production of primary plastic&composite fencing materials (plastic&composite = 100%)                                                                        | Production of primary fencing materials, mix based on market shares (steel fencing = 52%, wood fencing = 30%, plastic&composite = 11%, concrete = 7%) |   |
| The allocation factor A                                                                         | 0.5 (plastics)<br>0.2 (aluminium)                                                                                                                                                                    | 0.5                                                                                                                                                         |                                                                                                                                                       |   |

|                                                                                                                                                                                                            |                                                                                                                                                                                                                                                                                                                                                                                                                                                                                                                                                                                                                                                                                                                                                                                                                          |                                                                                                                                                                                                                                                                                                                                                                                                                           |                                                                                                                                                                                                                                                                                                                                                                                                                                                                                           |                                                                                                                                                                                                                                                                                                                                                                                                                                                                                                                                                                                                                                                        |
|------------------------------------------------------------------------------------------------------------------------------------------------------------------------------------------------------------|--------------------------------------------------------------------------------------------------------------------------------------------------------------------------------------------------------------------------------------------------------------------------------------------------------------------------------------------------------------------------------------------------------------------------------------------------------------------------------------------------------------------------------------------------------------------------------------------------------------------------------------------------------------------------------------------------------------------------------------------------------------------------------------------------------------------------|---------------------------------------------------------------------------------------------------------------------------------------------------------------------------------------------------------------------------------------------------------------------------------------------------------------------------------------------------------------------------------------------------------------------------|-------------------------------------------------------------------------------------------------------------------------------------------------------------------------------------------------------------------------------------------------------------------------------------------------------------------------------------------------------------------------------------------------------------------------------------------------------------------------------------------|--------------------------------------------------------------------------------------------------------------------------------------------------------------------------------------------------------------------------------------------------------------------------------------------------------------------------------------------------------------------------------------------------------------------------------------------------------------------------------------------------------------------------------------------------------------------------------------------------------------------------------------------------------|
| <p><b>The amount of Recycling process I allocated to the secondary fence board (per FU)</b></p> <p><b><math>R_1 \times (A E_{\text{recycled}})</math></b></p>                                              | <p> <math>1 \times (0.5 \times 25 \text{ kg} \times 0.3) = 3.75 \text{ kg } (E_{\text{recycled\_HDPE}})</math><br/> <math>1 \times (0.5 \times 25 \text{ kg} \times 0.3) = 3.75 \text{ kg } (E_{\text{recycled\_PP}})</math><br/> <math>1 \times (0.5 \times 25 \text{ kg} \times 0.1) = 1.25 \text{ kg } (E_{\text{recycled\_PC}})</math><br/> <math>1 \times (0.5 \times 25 \text{ kg} \times 0.1) = 1.25 \text{ kg } (E_{\text{recycled\_PA}})</math><br/> <math>1 \times (0.5 \times 25 \text{ kg} \times 0.1) = 1.25 \text{ kg } (E_{\text{recycled\_ABS}})</math><br/> <math>1 \times (0.2 \times 25 \text{ kg} \times 0.1) = 0.5 \text{ kg } (E_{\text{recycled\_aluminium}})</math> </p> <p><b>Total <math>E_{\text{recycled}} = 11.75 \text{ kg}</math></b></p>                                                 | <p><math>1 \times (0.5 \times 25 \text{ kg}) = 12.5 \text{ kg}</math></p> <p><b>Total <math>E_{\text{recycled}} = 12.5 \text{ kg}</math></b></p>                                                                                                                                                                                                                                                                          |                                                                                                                                                                                                                                                                                                                                                                                                                                                                                           |                                                                                                                                                                                                                                                                                                                                                                                                                                                                                                                                                                                                                                                        |
| <p><b>Quality correction <math>Q_{\text{Sin}}/Q_{\text{P}}</math></b></p>                                                                                                                                  | <p>1 (plastics)<br/>0.9 (aluminium)</p>                                                                                                                                                                                                                                                                                                                                                                                                                                                                                                                                                                                                                                                                                                                                                                                  | <p><math>E_v</math> parameter indirectly integrates the <math>Q_{\text{Sin}}/Q_{\text{P}}</math> parameter (expressed by differences in the durability of fencing), and therefore the <math>Q_{\text{Sin}}</math> and <math>Q_{\text{P}}</math> parameters are not part of the CFF</p>                                                                                                                                    |                                                                                                                                                                                                                                                                                                                                                                                                                                                                                           |                                                                                                                                                                                                                                                                                                                                                                                                                                                                                                                                                                                                                                                        |
|                                                                                                                                                                                                            |                                                                                                                                                                                                                                                                                                                                                                                                                                                                                                                                                                                                                                                                                                                                                                                                                          | <p>The analysed secondary board and a plastic market board have the same durability (15 years)</p>                                                                                                                                                                                                                                                                                                                        | <p>The analysed secondary board and all market fence boards have the same durability (15 years)</p>                                                                                                                                                                                                                                                                                                                                                                                       | <p>The analysed secondary board and all market fence boards have different durability</p>                                                                                                                                                                                                                                                                                                                                                                                                                                                                                                                                                              |
| <p><b>The amount of primary production allocated at the cradle (as debit) to the secondary fence board (per FU)</b></p> <p><b><math>R_1 \times (1-A) E_v \times Q_{\text{Sin}}/Q_{\text{P}}</math></b></p> | <p> <math>1 \times ((1-0.5) \times 25 \text{ kg} \times 0.3 \times 0.9) = 3.375 \text{ kg } (E_{v\_primary\_HDPE})</math><br/> <math>1 \times ((1-0.5) \times 25 \text{ kg} \times 0.3 \times 0.9) = 3.375 \text{ kg } (E_{v\_primary\_PP})</math><br/> <math>1 \times ((1-0.5) \times 25 \text{ kg} \times 0.3 \times 0.9) = 3.375 \text{ kg } (E_{v\_primary\_PC})</math><br/> <math>1 \times ((1-0.5) \times 25 \text{ kg} \times 0.1 \times 0.9) = 1.125 \text{ kg } (E_{v\_primary\_PA})</math><br/> <math>1 \times ((1-0.5) \times 25 \text{ kg} \times 0.1 \times 0.9) = 1.125 \text{ kg } (E_{v\_primary\_ABS})</math><br/> <math>1 \times ((1-0.2) \times 25 \text{ kg} \times 0.1 \times 1) = 0.5 \text{ kg } (E_{v\_primary\_aluminium})</math> </p> <p><b>Total <math>E_v = 10.625 \text{ kg}</math></b></p> | <p> <math>(1 \text{ m2 fence} = 28 \text{ kg PVC})</math><br/> <math>1 \times (1-0.5) \times 28 \text{ kg} \times 15\text{yrs}/15\text{yrs} = 14 \text{ kg } (E_{v\_plastic\&amp;composites\_15\text{years}})</math> </p> <p><b>Total <math>E_v = 14 \text{ kg}</math></b></p> <p>If the secondary fence board and the plastic market board have the same durability, then the secondary fencing product system is to</p> | <p> <math>(0.52 \text{ m2 fence} = 82.1 \text{ kg steel})</math><br/> <math>1 \times (1-0.5) \times 82.1 \text{ kg} \times 15\text{yrs}/15\text{yrs} = 41.04 \text{ kg } (E_{v\_steel\_15\text{years}})</math> </p> <p> <math>(0.3 \text{ m2 fence} = 4.2 \text{ kg wood})</math><br/> <math>1 \times (1-0.5) \times 4.2 \times 15\text{yrs}/15\text{yrs} = 2.10 \text{ kg } (E_{v\_wood\_15\text{years}})</math> </p> <p> <math>(0.11 \text{ m2 fence} = 3.0 \text{ kg PVC})</math> </p> | <p> <math>(0.52 \text{ m2 fence} = 82.1 \text{ kg steel})</math><br/> <math>1 \times (1-0.5) \times 82.1 \text{ kg} \times 15\text{yrs}/40\text{yrs} = 5.77 \text{ kg } (E_{v\_steel\_40\text{years}})</math> </p> <p> <math>(0.3 \text{ m2 fence} = 4.2 \text{ kg wood})</math><br/> <math>1 \times (1-0.5) \times 4.2 \times 15\text{yrs}/20\text{yrs} = 0.53 \text{ kg } (E_{v\_wood\_20\text{years}})</math> </p> <p> <math>(0.11 \text{ m2 fence} = 3.0 \text{ kg PVC})</math><br/> <math>1 \times (1-0.5) \times 3.0 \text{ kg} \times 15\text{yrs}/15\text{yrs} = 1.49 \text{ kg } (E_{v\_plastic\&amp;composites\_15\text{years}})</math> </p> |

|  |                                                                                                                                                                              |                                                                                                                    |                                                                                                                                                                                                                                                                                                                                                                                                                                                                                                                                                                                                                                                                           |                                                                                                                                                                                                                                                                                                                                                                                                                                                                                                             |
|--|------------------------------------------------------------------------------------------------------------------------------------------------------------------------------|--------------------------------------------------------------------------------------------------------------------|---------------------------------------------------------------------------------------------------------------------------------------------------------------------------------------------------------------------------------------------------------------------------------------------------------------------------------------------------------------------------------------------------------------------------------------------------------------------------------------------------------------------------------------------------------------------------------------------------------------------------------------------------------------------------|-------------------------------------------------------------------------------------------------------------------------------------------------------------------------------------------------------------------------------------------------------------------------------------------------------------------------------------------------------------------------------------------------------------------------------------------------------------------------------------------------------------|
|  | <p>The secondary fencing product system is to be debited at the cradle with 10.625 kg of primary production of packaging materials (per FU, 1 m<sup>2</sup> of fencing).</p> | <p>be debited at the cradle with 14 kg of primary PVC fencing production (per FU, 1 m<sup>2</sup> of fencing).</p> | <p> <math>1 \times (1-0.5) \times 3.0 \text{ kg} \times 15\text{yrs}/15\text{yrs} = 1.49 \text{ kg}</math><br/> (EV_plastic&amp;composites_15years) </p> <p> <math>(0.07 \text{ m}^2 \text{ fence} = 3.5 \text{ kg concrete})</math> </p> <p> <math>1 \times (1-0.5) \times 3.5 \text{ kg} \times 15\text{yrs}/15\text{yrs} = 1.76 \text{ kg}</math><br/> (EV_concrete_15 years) </p> <p><b>Total E<sub>v</sub> = 46.39 kg</b></p> <p>If all fence boards have the same durability, then the secondary fencing product system is to be debited at the cradle with 46.39 kg of primary production of different fencing materials (per FU, 1 m<sup>2</sup> of fencing).</p> | <p> <math>(0.07 \text{ m}^2 \text{ fence} = 3.5 \text{ kg concrete})</math> </p> <p> <math>1 \times (1-0.5) \times 3.5 \text{ kg} \times 15\text{yrs}/40\text{yrs} = 0.25 \text{ kg}</math><br/> (EV_concrete_40 years) </p> <p><b>Total E<sub>v</sub> = 8.04 kg</b></p> <p>If fence boards have different durability, then the secondary fencing product system is to be debited at the cradle with 8.04 kg of primary production of different fencing materials (per FU, 1 m<sup>2</sup> of fencing).</p> |
|--|------------------------------------------------------------------------------------------------------------------------------------------------------------------------------|--------------------------------------------------------------------------------------------------------------------|---------------------------------------------------------------------------------------------------------------------------------------------------------------------------------------------------------------------------------------------------------------------------------------------------------------------------------------------------------------------------------------------------------------------------------------------------------------------------------------------------------------------------------------------------------------------------------------------------------------------------------------------------------------------------|-------------------------------------------------------------------------------------------------------------------------------------------------------------------------------------------------------------------------------------------------------------------------------------------------------------------------------------------------------------------------------------------------------------------------------------------------------------------------------------------------------------|

**Table S2.** Recycling at the EoL ( $E_{\text{recycling\_EoL}}$ ) and substitution modelling options for credited primary production ( $E^*_v$ ), results per functional unit (1 m<sup>2</sup> of secondary fence board)

|                                                                                          | SUBSTITUTION MODELLING OPTIONS - RECYCLING AT THE END OF LIFE |                                                                                                                                                                                                              |                                                                                                                                                                                       |                                                                                                                                                                                                                                              |   |   |
|------------------------------------------------------------------------------------------|---------------------------------------------------------------|--------------------------------------------------------------------------------------------------------------------------------------------------------------------------------------------------------------|---------------------------------------------------------------------------------------------------------------------------------------------------------------------------------------|----------------------------------------------------------------------------------------------------------------------------------------------------------------------------------------------------------------------------------------------|---|---|
|                                                                                          | A                                                             | excluded                                                                                                                                                                                                     | excluded                                                                                                                                                                              | B                                                                                                                                                                                                                                            | C | D |
| Recycling rate R <sub>2</sub>                                                            | R <sub>2</sub> = 0                                            | R <sub>2</sub> = 0.499                                                                                                                                                                                       |                                                                                                                                                                                       |                                                                                                                                                                                                                                              |   |   |
| Recycling at EoL<br>(E <sub>recycling_EoL</sub> )                                        | n.a.                                                          | Recycling process II                                                                                                                                                                                         |                                                                                                                                                                                       |                                                                                                                                                                                                                                              |   |   |
| Functions provided by<br>Recycling<br>process II                                         | n.a.                                                          | <ul style="list-style-type: none"><li>• Treatment of waste secondary fence board</li><li>• Production of secondary pots (final product)</li></ul>                                                            |                                                                                                                                                                                       |                                                                                                                                                                                                                                              |   |   |
| Output of<br>Recycling<br>process II<br>(per FU of 1 m <sup>2</sup> of fencing)          | n.a.                                                          | <ul style="list-style-type: none"><li>• Treated 12.5 kg of waste secondary fence board</li><li>• 12.48 kg of secondary pots with durability of 5 years and total capacity of 39 liters</li></ul>             |                                                                                                                                                                                       |                                                                                                                                                                                                                                              |   |   |
| What market is to be affected by<br>generating the recycled product<br>(secondary pots)? | n.a.                                                          | Packaging<br>market                                                                                                                                                                                          | Fencing<br>market                                                                                                                                                                     | Pots market                                                                                                                                                                                                                                  |   |   |
| Why is the market to be<br>affected?                                                     | n.a.                                                          | Quality of waste secondary board is too low to be considered as a source of recycled materials for packaging industry. <i>Additionally,</i> Recycling process II generates a clearly defined secondary final | In theory, the waste secondary board could be used to generate recycled materials and produce secondary fencing (closed-loop recycling). Then the fencing market would be affected by | Use of waste secondary fence board to generate recycled materials by Recycling process II and to produce secondary pots ( <i>open-loop recycling</i> ) affects the pots market by reducing the production of pots made of primary materials. |   |   |

|                                                   |      |                                                                                                                                                                                 |                                                                                                                                                                                                                                                                                                                                     |                                                           |                                                                                                                            |
|---------------------------------------------------|------|---------------------------------------------------------------------------------------------------------------------------------------------------------------------------------|-------------------------------------------------------------------------------------------------------------------------------------------------------------------------------------------------------------------------------------------------------------------------------------------------------------------------------------|-----------------------------------------------------------|----------------------------------------------------------------------------------------------------------------------------|
|                                                   |      | product with a strict application of providing protection and stability for plants. For this reason, we assumed that Recycling process II does not affect the packaging market. | reducing the production of primary fencing. However, in our example, we assumed that Recycling process II generates a clearly defined secondary final product with a strict application of providing protection and stability for plants. For this reason, we assumed that Recycling process II does not affect the fencing market. |                                                           |                                                                                                                            |
| <b>What is the primary production?</b><br>$E_v^*$ | n.a. | No reason to model production of primary packaging materials as $E_v^*$                                                                                                         | No reason to model production of primary fencing materials as $E_v^*$                                                                                                                                                                                                                                                               | Production of primary plastic pots (HDPE material = 100%) | Production of primary pots, mix based on market shares (refractory materials = 47%, polymer = 31%, metal = 13%, wood = 9%) |
| <b>Allocation factor A</b>                        | n.a. | Excluded                                                                                                                                                                        |                                                                                                                                                                                                                                                                                                                                     | 0.5                                                       |                                                                                                                            |



|                                                                                                                                                                                   |      |          |                                                                                                                                                                                                                                                                                                                                                                                                               |                                                                                                                                                                                                                                                                                                             |                                                                                                                                                                                                                                                                                                                                                                                                                                                                                                                                                             |
|-----------------------------------------------------------------------------------------------------------------------------------------------------------------------------------|------|----------|---------------------------------------------------------------------------------------------------------------------------------------------------------------------------------------------------------------------------------------------------------------------------------------------------------------------------------------------------------------------------------------------------------------|-------------------------------------------------------------------------------------------------------------------------------------------------------------------------------------------------------------------------------------------------------------------------------------------------------------|-------------------------------------------------------------------------------------------------------------------------------------------------------------------------------------------------------------------------------------------------------------------------------------------------------------------------------------------------------------------------------------------------------------------------------------------------------------------------------------------------------------------------------------------------------------|
| <p>What amount of Recycling process II is allocated to the secondary fence board (per FU)?</p> $(1-A)R_2 \times E_{\text{recyclingEoL}}$                                          | n.a. | Excluded | $(1-0.5) \times 0.499 \times 25 \text{ kg} = 12.48 \text{ kg}$<br><b>Total <math>E_{\text{recycling\_EoL}} = 12.48 \text{ kg}</math></b>                                                                                                                                                                                                                                                                      |                                                                                                                                                                                                                                                                                                             |                                                                                                                                                                                                                                                                                                                                                                                                                                                                                                                                                             |
| <p>Quality correction</p> $\frac{Q_{\text{Sout}}}{Q_p}$                                                                                                                           | n.a. | Excluded | <p><math>E^*_v</math> parameter indirectly integrates the <math>Q_{\text{Sout}}/Q_p</math> parameter (expressed by differences in durability of pots), and therefore the <math>Q_{\text{Sout}}</math> and <math>Q_p</math> parameters are not part of the CFF)</p>                                                                                                                                            |                                                                                                                                                                                                                                                                                                             |                                                                                                                                                                                                                                                                                                                                                                                                                                                                                                                                                             |
|                                                                                                                                                                                   |      |          | Polymer pots have durability of 5 years                                                                                                                                                                                                                                                                                                                                                                       | Pots have the same durability of 5 years                                                                                                                                                                                                                                                                    | Pots have different durability                                                                                                                                                                                                                                                                                                                                                                                                                                                                                                                              |
| <p>What amount of primary production is allocated at the EoL (as credit) to the secondary fence board (per FU)?</p> $(1-A)R_2 \times (-E^*_v \times \frac{Q_{\text{Sout}}}{Q_p})$ | n.a. | Excluded | <p>(39 litres x 1 x 0.25 kg/litre = 9.75 kg polymer/HDPE/)</p> <p><math>(1-0.5) \times 0.499 \times (-9.75 \text{ kg} \times 5\text{yrs}/5\text{yrs}) = -2.43 \text{ kg}</math><br/> <math>(E^*_{V\_polymer\_HDPE\_5\text{years}})</math></p> <p><b>Total <math>E^*_v = -2.43 \text{ kg}</math></b></p> <p>If polymer pots have durability of 5 years, then the secondary fencing product system is to be</p> | <p>(39 litres x 0.47 x 0.5 x 0.5 kg/litre = 4.71 kg ceramic)</p> <p><math>(1-0.5) \times 0.499 \times (-4.71 \text{ kg} \times 5\text{yrs}/5\text{yrs}) = -1.18 \text{ kg}</math><br/> <math>(E^*_{V\_ceramic\_5\text{years}})</math></p> <p>(39 litres x 0.47 x 0.5 x 0.5 kg/litre = 4.71 kg concrete)</p> | <p>(39 litres x 0.47 x 0.5 x 0.5 kg/litre = 4.71 kg ceramic)</p> <p><math>(1-0.5) \times 0.499 \times (-4.71 \text{ kg} \times 5\text{yrs}/10\text{yrs}) = -0.59 \text{ kg}</math><br/> <math>(E^*_{V\_ceramic\_10\text{years}})</math></p> <p>(39 litres x 0.47 x 0.5 x 0.5 kg/litre = 4.71 kg concrete)</p> <p><math>(1-0.5) \times 0.499 \times (-4.71 \text{ kg} \times 5\text{yrs}/10\text{yrs}) = -0.59 \text{ kg}</math><br/> <math>(E^*_{V\_concrete\_10\text{years}})</math></p> <p>(39 litres x 0.31 x 0.25 kg/litre = 2.98 kg polymer/HDPE/)</p> |

|  |  |  |                                                                                                    |                                                                                                                                                                                                                                                                                                                                                                                                                                                                                                                                                                                                                                                                                                                                                                                                                                                                                                                                                                                                                                                                                                               |                                                                                                                                                                                                                                                                                                                                                                                                                                                                                                                                                                                                                                                                                                                                                                                                                                                                |
|--|--|--|----------------------------------------------------------------------------------------------------|---------------------------------------------------------------------------------------------------------------------------------------------------------------------------------------------------------------------------------------------------------------------------------------------------------------------------------------------------------------------------------------------------------------------------------------------------------------------------------------------------------------------------------------------------------------------------------------------------------------------------------------------------------------------------------------------------------------------------------------------------------------------------------------------------------------------------------------------------------------------------------------------------------------------------------------------------------------------------------------------------------------------------------------------------------------------------------------------------------------|----------------------------------------------------------------------------------------------------------------------------------------------------------------------------------------------------------------------------------------------------------------------------------------------------------------------------------------------------------------------------------------------------------------------------------------------------------------------------------------------------------------------------------------------------------------------------------------------------------------------------------------------------------------------------------------------------------------------------------------------------------------------------------------------------------------------------------------------------------------|
|  |  |  | credited at EoL with 2.43 kg of primary HDPE pots production (per FU 1 m <sup>2</sup> of fencing). | $(1-0.5) \times 0.499 \times (-4.71 \text{ kg} \times 5\text{yrs}/5\text{yrs}) = -1.18 \text{ kg}$<br>$(E^*V_{\text{concrete\_5years}})$<br>$(39 \text{ litres} \times 0.31 \times 0.25 \text{ kg/litre} = 2.98 \text{ kg polymer/HDP E/})$<br>$(1-0.5) \times 0.499 \times (-2.98 \text{ kg} \times 5\text{yrs}/5\text{yrs}) = -0.74 \text{ kg}$<br>$(E^*V_{\text{polymer\_HDPE\_5years}})$<br>$(39 \text{ litres} \times 0.13 \times 1.99 \text{ kg/litre} = 10.32 \text{ kg metal/steel/})$<br>$(1-0.5) \times 0.499 \times (-10.32 \text{ kg} \times 5\text{yrs}/10\text{yrs}) = -1.29 \text{ kg}$<br>$(E^*V_{\text{metal\_steel\_10years}})$<br>$(39 \text{ litres} \times 0.09 \times 0.18 \text{ kg/litre} = 0.63 \text{ kg wood})$<br>$(1-0.5) \times 0.499 \times (-0.63 \text{ kg} \times 5\text{yrs}/8\text{yrs}) = -0.01 \text{ kg}$<br>$(E^*V_{\text{wood\_8years}})$<br><b>Total E*v = -3.31 kg</b><br><p>If pots have the same durability, then the secondary fencing product system is to be credited at EoL with 3.31 kg of primary pots production (per FU 1 m<sup>2</sup> of fencing).</p> | $(1-0.5) \times 0.499 \times (-2.98 \text{ kg} \times 5\text{yrs}/5\text{yrs}) = -0.74 \text{ kg}$<br>$(E^*V_{\text{polymer\_HDPE\_5years}})$<br>$(39 \text{ litres} \times 0.13 \times 1.99 \text{ kg/litre} = 10.32 \text{ kg metal/steel/})$<br>$(1-0.5) \times 0.499 \times (-10.32 \text{ kg} \times 5\text{yrs}/10\text{yrs}) = -1.29 \text{ kg}$<br>$(E^*V_{\text{metal\_steel\_10years}})$<br>$(39 \text{ litres} \times 0.09 \times 0.18 \text{ kg/litre} = 0.63 \text{ kg wood})$<br>$(1-0.5) \times 0.499 \times (-0.63 \text{ kg} \times 5\text{yrs}/8\text{yrs}) = -0.01 \text{ kg}$<br>$(E^*V_{\text{wood\_8years}})$<br><b>Total E*v = -3.31 kg</b><br><p>If pots have the same durability, then the secondary fencing product system is to be credited at EoL with 3.31 kg of primary pots production (per FU 1 m<sup>2</sup> of fencing).</p> |
|--|--|--|----------------------------------------------------------------------------------------------------|---------------------------------------------------------------------------------------------------------------------------------------------------------------------------------------------------------------------------------------------------------------------------------------------------------------------------------------------------------------------------------------------------------------------------------------------------------------------------------------------------------------------------------------------------------------------------------------------------------------------------------------------------------------------------------------------------------------------------------------------------------------------------------------------------------------------------------------------------------------------------------------------------------------------------------------------------------------------------------------------------------------------------------------------------------------------------------------------------------------|----------------------------------------------------------------------------------------------------------------------------------------------------------------------------------------------------------------------------------------------------------------------------------------------------------------------------------------------------------------------------------------------------------------------------------------------------------------------------------------------------------------------------------------------------------------------------------------------------------------------------------------------------------------------------------------------------------------------------------------------------------------------------------------------------------------------------------------------------------------|

|                                                                                                              |                                                 |          |                                                                                       |                                                                                                                                                                                                                                                                                                                                                            |  |
|--------------------------------------------------------------------------------------------------------------|-------------------------------------------------|----------|---------------------------------------------------------------------------------------|------------------------------------------------------------------------------------------------------------------------------------------------------------------------------------------------------------------------------------------------------------------------------------------------------------------------------------------------------------|--|
|                                                                                                              |                                                 |          |                                                                                       | $(-0.63 \text{ kg} \times 5\text{yrs}/5\text{yrs}) = -0.16 \text{ kg}$<br>$(E^*_{V\_wood\_5\text{years}})$<br><br><b>Total <math>E^*_v = -5.84 \text{ kg}</math></b><br>If pots have the same durability, then the secondary fencing product system is to be credited at EoL with 5.84 kg of primary pots production (per FU 1 m <sup>2</sup> of fencing). |  |
| <b>What amount of waste secondary board is sent for landfill? (99%)</b><br><b>(E<sub>D</sub>)</b>            | $25 \text{ kg} \times 0.99 = 24.75 \text{ kg}$  | Excluded | $(25 \text{ kg} - 25 \text{ kg} \times 0.5) \times 0.99 = \mathbf{12.375 \text{ kg}}$ |                                                                                                                                                                                                                                                                                                                                                            |  |
| <b>What amount of waste secondary board is sent for incineration) per FU? (1%)</b><br><b>(R<sub>3</sub>)</b> | $25 \text{ kg} \times 0.01 = 0.2475 \text{ kg}$ | Excluded | $(25 \text{ kg} - 25 \text{ kg} \times 0.5) \times 0.01 = \mathbf{0.125 \text{ kg}}$  |                                                                                                                                                                                                                                                                                                                                                            |  |

**Table S3** Inventory results for *Production of secondary fence board* (Recycling process I)  
- results per FU, 1 m<sup>2</sup> of fence board

| PRODUCTION OF SECONDARY FENCE BOARD (RECYCLING PROCESS I)                                                                       |        |      |
|---------------------------------------------------------------------------------------------------------------------------------|--------|------|
| Ecoinvent dataset ( <a href="https://ecoinvent.org/database/">https://ecoinvent.org/database/</a> (accessed on 12 February 24)) | Amount | Unit |
| <i>Inputs</i>                                                                                                                   |        |      |
| Polypropylene, granulate {GLO}   market for   Cut-off, U                                                                        | 0.06   | Kg   |
| Injection moulding {GLO}   market for   Cut-off, U                                                                              | 0.06   | Kg   |
| Steel, chromium steel 18/8 {GLO}   market for   Cut-off, U                                                                      | 1.89   | G    |
| Silicone product {RER}   market for silicone product   Cut-off, U                                                               | 0.45   | G    |
| Ethylene glycol {GLO}   market for   Cut-off, U                                                                                 | 0.4    | G    |
| Lubricating oil {RER}   market for lubricating oil   Cut-off, U                                                                 | 1.71   | G    |
| Liquefied petroleum gas {GLO}   market group for liquefied petroleum gas   Cut-off, U                                           | 0.08   | Kg   |
| Electricity, low voltage {PL}   market for   Cut-off, U                                                                         | 48.65  | kWh  |
| <i>Outputs</i>                                                                                                                  |        |      |
| Mixed plastics (waste treatment) {GLO}   recycling of mixed plastics   Cut-off, U                                               | 0.06   | Kg   |
| Hazardous waste, for incineration {Europe without Switzerland}   market for hazardous waste, for incineration   Cut-off, U      | 2.11   | G    |
| Waste plastic, mixture {RoW}   treatment of waste plastic, mixture, municipal incineration   Cut-off, U                         | 0.45   | G    |
| Steel and iron (waste treatment) {GLO}   recycling of steel and iron   Cut-off, U                                               | 1.89   | G    |

Source: own elaboration based in calculations SimaPro software

**Table S4** Inventory results for *Production of secondary garden pots* (Recycling process II)  
- results per FU, 1 m<sup>2</sup> of fence board

| PRODUCTION OF SECONDARY GARDEN POTS (RECYCLING PROCESS II)                                                                                 |          |      |
|--------------------------------------------------------------------------------------------------------------------------------------------|----------|------|
| Ecoinvent dataset ( <a href="https://ecoinvent.org/database/">https://ecoinvent.org/database/</a> (accessed on 12 February 24))            | Amount   | Unit |
| <i>Inputs</i>                                                                                                                              |          |      |
| Steel, low-alloyed {GLO}   market for   Cut-off, U                                                                                         | 0.008668 | Kg   |
| Waste preparation facility {GLO}   market for waste preparation facility   Cut-off, U                                                      | 2.21E-09 | P    |
| Wire drawing, steel {RER}   processing   Cut-off, U                                                                                        | 0.008668 | Kg   |
| Thermoforming of plastic sheets {GLO}   market for   Cut-off, U                                                                            | 1        | Kg   |
| Diesel, burned in building machine {GLO}   market for   Cut-off, U                                                                         | 0.068825 | MJ   |
| Electricity, low voltage {Europe without Switzerland}   market group for   Cut-off, U                                                      | 0.017383 | kWh  |
| Heat, district or industrial, natural gas {Europe without Switzerland}   market for heat, district or industrial, natural gas   Cut-off, U | 8.6E-05  | MJ   |
| Propane, burned in building machine {GLO}   market for   Cut-off, U                                                                        | 0.018145 | MJ   |
| <i>Outputs</i>                                                                                                                             |          |      |
| Waste plastic, mixture {Europe without Switzerland}   market group for waste plastic, mixture   Cut-off, U                                 | 0.104972 | Kg   |

Source: own elaboration based in calculations SimaPro software

**Table S5** Inventory results for life cycle stage *Materials & production – secondary fence board for options 1,2,3 and 4* - results per FU, 1 m<sup>2</sup> of fence board  
(based on calculations with the CFF formula,  $R_{1\_fence\_board} = 1.0$  and  $A_{\_fence\_board} = 0.5$ )

| MATERIALS & PRODUCTION – SECONDARY FENCE BOARD – OPTION 1<br>(primary production of packaging debited)                                                |        |      |
|-------------------------------------------------------------------------------------------------------------------------------------------------------|--------|------|
| Ecoinvent dataset ( <a href="https://ecoinvent.org/database/">https://ecoinvent.org/database/</a> (accessed on 12 February 24)                        | Amount | Unit |
| <i>Inputs</i>                                                                                                                                         |        |      |
| Production of secondary fence board (Recycling process I)                                                                                             | 3.75   | Kg   |
| Polyethylene, high density, granulate {GLO}   market for   Cut-off, U (debit)                                                                         | 3.375  | Kg   |
| Injection moulding {GLO}   market for   Cut-off, U (debit)                                                                                            | 3.375  | Kg   |
| Production of secondary fence board (Recycling process I)                                                                                             | 3.75   | Kg   |
| Polypropylene, granulate {GLO}   market for   Cut-off, U (debit)                                                                                      | 3.375  | Kg   |
| Injection moulding {GLO}   market for   Cut-off, U (debit)                                                                                            | 3.375  | Kg   |
| Production of secondary fence board (Recycling process I)                                                                                             | 1.25   | Kg   |
| Polycarbonate {GLO}   market for   Cut-off, U (debit)                                                                                                 | 1.125  | Kg   |
| Injection moulding {GLO}   market for   Cut-off, U (debit)                                                                                            | 1.125  | Kg   |
| Production of secondary fence board (Recycling process I)                                                                                             | 1.25   | Kg   |
| Nylon 6-6 {RER}   market for nylon 6-6   Cut-off, U (debit)                                                                                           | 1.125  | Kg   |
| Injection moulding {GLO}   market for   Cut-off, U (debit)                                                                                            | 1.125  | Kg   |
| Production of secondary fence board (Recycling process I)                                                                                             | 1.25   | Kg   |
| Acrylonitrile-butadiene-styrene copolymer {GLO}   market for   Cut-off, U (debit)                                                                     | 1.125  | Kg   |
| Injection moulding {GLO}   market for   Cut-off, U (debit)                                                                                            | 1.125  | Kg   |
| Production of secondary fence board (Recycling process I)                                                                                             | 0.5    | Kg   |
| Aluminium, primary, liquid {GLO}   market for   Cut-off, U (debit)                                                                                    | 0.5    | Kg   |
| Total Production of secondary fence board (Recycling process I):                                                                                      | 11.75  | Kg   |
| Total debited primary production:                                                                                                                     | 10.625 | Kg   |
| MATERIALS & PRODUCTION – SECONDARY FENCE BOARD – OPTION 2<br>(primary production of market fence debited, PVC panel, equal durability of fencing)     |        |      |
| Name                                                                                                                                                  | Amount | Unit |
| <i>Inputs</i>                                                                                                                                         |        |      |
| Production of secondary fence board (Recycling process I)                                                                                             | 12.5   | Kg   |
| Polyvinylchloride, bulk polymerised {GLO}   market for   Cut-off, U (debit)                                                                           | 14     | Kg   |
| Thermoforming of plastic sheets {GLO}   market for   Cut-off, U (debit, processing)                                                                   |        |      |
| Total Production of secondary fence board (Recycling process I):                                                                                      | 12.5   | Kg   |
| Total debited primary production:                                                                                                                     | 14     | Kg   |
| MATERIALS & PRODUCTION – SECONDARY FENCE BOARD – OPTION 3<br>(primary production of market fence debited, materials mix, equal durability of fencing) |        |      |
| Name                                                                                                                                                  | Amount | Unit |
| <i>Inputs</i>                                                                                                                                         |        |      |

|                                                                                                                                                                |               |             |
|----------------------------------------------------------------------------------------------------------------------------------------------------------------|---------------|-------------|
| Production of secondary fence board (Recycling process I)                                                                                                      | 12.5          | Kg          |
| Steel, low-alloyed {GLO}   market for   Cut-off, U (debit)                                                                                                     | 41.04         | Kg          |
| Sheet rolling, steel {GLO}   market for   Cut-off, U (debit)                                                                                                   |               |             |
| Sawnwood, beam, softwood, dried (u=10%), planed {Europe without Switzerland}   market for sawnwood, beam, softwood, dried (u=10%), planed   Cut-off, U (debit) | 0.0028        | m3          |
| Polyvinylchloride, bulk polymerised {GLO}   market for   Cut-off, U (debit)                                                                                    | 1.49          | Kg          |
| Thermoforming of plastic sheets {GLO}   market for   Cut-off, U (debit)                                                                                        |               |             |
| Concrete block {RoW}   production   Cut-off, U (debit)                                                                                                         | 1.76          | Kg          |
| Total Production of secondary fence board (Recycling process I):                                                                                               | 12.5          | Kg          |
| Total debited primary production:                                                                                                                              | 46.39         | Kg          |
| MATERIALS & PRODUCTION – SECONDARY FENCE BOARD – OPTION 4<br>(primary production of market fence debited, materials mix, different durability of fencing)      |               |             |
| <b>Name</b>                                                                                                                                                    | <b>Amount</b> | <b>Unit</b> |
| <i>Inputs</i>                                                                                                                                                  |               |             |
| Production of secondary fence board (Recycling process I)                                                                                                      | 12.5          | Kg          |
| Steel, low-alloyed {GLO}   market for   Cut-off, U (debit)                                                                                                     | 5.77          | Kg          |
| Sheet rolling, steel {GLO}   market for   Cut-off, U (debit)                                                                                                   |               |             |
| Sawnwood, beam, softwood, dried (u=10%), planed {Europe without Switzerland}   market for sawnwood, beam, softwood, dried (u=10%), planed   Cut-off, U (debit) | 0.000701      | m3          |
| Polyvinylchloride, bulk polymerised {GLO}   market for   Cut-off, U (debit)                                                                                    | 1.49          | Kg          |
| Thermoforming of plastic sheets {GLO}   market for   Cut-off, U (debit)                                                                                        |               |             |
| Concrete block {RoW}   production   Cut-off, U (debit)                                                                                                         | 0.25          | Kg          |
| Total Production of secondary fence board (Recycling process I):                                                                                               | 12.5          | Kg          |
| Total debited primary production:                                                                                                                              | 8.04          | Kg          |

Source: own elaboration based in calculations SimaPro software

**Table S6** Inventory results for life cycle stage *Materials – auxiliary materials*  
- results per FU, 1 m<sup>2</sup> of fence board

|                                                                                                                                                        |               |             |
|--------------------------------------------------------------------------------------------------------------------------------------------------------|---------------|-------------|
| MATERIALS - AUXILIARY MATERIALS<br>(wooden fence posts, wood preservative, steel screws, and steel bolts)                                              |               |             |
| <b>Ecoinvent dataset (<a href="https://ecoinvent.org/database/">https://ecoinvent.org/database/</a> (accessed on 12 February 24))</b>                  | <b>Amount</b> | <b>Unit</b> |
| <i>Inputs</i>                                                                                                                                          |               |             |
| Sawnwood, beam, softwood, dried (u=10%), planed {Europe without Switzerland}   market for sawnwood, beam, softwood, dried (u=10%), planed   Cut-off, U | 0.004762      | m3          |
| Wood preservative, creosote {RER}   market for wood preservative, creosote   Cut-off, U                                                                | 0.037278      | kg          |
| Steel, chromium steel 18/8 {GLO}   market for   Cut-off, U                                                                                             | 0.42          | kg          |

Source: own elaboration based in calculations SimaPro software

**Table S7** Inventory results for life cycle stage *Transport to the installation place*  
- results per FU, 1 m<sup>2</sup> of fence board

| TRANSPORT TO THE INSTALLATION PLACE                                                                                                     |                                                                                  |      |
|-----------------------------------------------------------------------------------------------------------------------------------------|----------------------------------------------------------------------------------|------|
| Ecoinvent dataset ( <a href="https://ecoinvent.org/database/">https://ecoinvent.org/database/</a> (accessed on 12 February 24))         | Amount                                                                           | Unit |
| <i>Inputs</i>                                                                                                                           |                                                                                  |      |
| Transport, freight, lorry 3.5-7.5 metric ton, euro6 {RER}   market for transport, freight, lorry 3.5-7.5 metric ton, EURO6   Cut-off, U | 8125.5<br>(Load: 70 kg board + 11.25 kg auxiliary materials<br>Distance: 100 km) | Kgkm |

Source: own elaboration based in calculations SimaPro software

**Table S8** Inventory results for life cycle stage *Installation and maintenance* (15 years of lifetime) - results per FU, 1 m<sup>2</sup> of fence board

| INSTALATION AND MAINTENANCE<br>(drilling and screwing, maintenance of wooden posts, cleaning)                                   |        |      |
|---------------------------------------------------------------------------------------------------------------------------------|--------|------|
| Ecoinvent dataset ( <a href="https://ecoinvent.org/database/">https://ecoinvent.org/database/</a> (accessed on 12 February 24)) | Amount | Unit |
| <i>Inputs</i>                                                                                                                   |        |      |
| Wood preservative, creosote {RER}   market for wood preservative, creosote   Cut-off, U                                         | 0.104  | Kg   |
| Tap water {Europe without Switzerland}   market for   Cut-off, U                                                                | 56     | Kg   |
| Electricity, low voltage {PL}   market for   Cut-off, U                                                                         | 0.058  | kWh  |
| Wastewater, unpolluted {RoW}   market for wastewater, unpolluted   Cut-off, U                                                   | 56     | L    |

Source: own elaboration based in calculations SimaPro software

**Table S9** Inventory results for life cycle stage *End of life - auxiliary materials*  
- results per FU, 1 m<sup>2</sup> of fence board

(based on calculations with the CFF formula,  $R_{2\_wood} = 0.38$ ,  $A_{\_wood} = 0.8$ ,  $R_{2\_steel} = 0.85$ ,  $A_{\_steel} = 0.2$ , the fraction of the waste not sent for recycling is to be disposed of as follows: 99% landfilled and 1% incinerated)

| END OF LIFE - AUXILIARY MATERIALS                                                                                                                               |                                           |      |
|-----------------------------------------------------------------------------------------------------------------------------------------------------------------|-------------------------------------------|------|
| Ecoinvent dataset ( <a href="https://ecoinvent.org/database/">https://ecoinvent.org/database/</a> (accessed on 12 February 24))                                 | Amount                                    | Unit |
| <i>Inputs</i>                                                                                                                                                   |                                           |      |
| Transport, freight, lorry 7.5-16 metric ton, euro6 {RER}   market for transport, freight, lorry 7.5-16 metric ton, EURO6   Cut-off, U                           | 402<br>(Load: 4.2 kg<br>Distance: 100 km) | kgkm |
| Sawnwood, beam, softwood, dried (u=10%), planed {Europe without Switzerland}   market for sawnwood, beam, softwood, dried (u=10%), planed   Cut-off, U (credit) | -0.00036                                  | m3   |
| Steel, chromium steel 18/8 {GLO}   market for   Cut-off, U (credit)                                                                                             | -0.286                                    | kg   |
| <i>Outputs</i>                                                                                                                                                  |                                           |      |
| Waste bulk iron, excluding reinforcement {Europe without Switzerland}   treatment of waste bulk iron, excluding reinforcement, sorting plant   Cut-off, U       | 0.286                                     | kg   |

|                                                                                                                 |       |    |
|-----------------------------------------------------------------------------------------------------------------|-------|----|
| Waste brick {Europe without Switzerland}   treatment of waste brick, sorting plant   Cut-off, U (used as proxy) | 0.274 | kg |
| Waste wood, untreated {RoW}   treatment of, sanitary landfill   Cut-off, U                                      | 2.21  | kg |
| Waste building wood, chrome preserved {RoW}   treatment of, municipal incineration   Cut-off, U                 | 0.022 | kg |
| Inert waste {Europe without Switzerland}   treatment of inert waste, sanitary landfill   Cut-off, U             | 0.062 | kg |
| Scrap steel {Europe without Switzerland}   treatment of scrap steel, municipal incineration   Cut-off, U        | 0.001 | kg |

Source: own elaboration based in calculations SimaPro software

**Table S10** Inventory results for life cycle stage *End of life – secondary fence board*  
- results per FU, 1 m<sup>2</sup> of fence board

(based on calculations with the CFF formula,  $R_{2\_fence\_board} = 0.499$ ,  $A_{fence\_board} = 0.5$

the fraction of the waste not sent for recycling is to be disposed of as follows: 99% landfilled and 1% incinerated)

| END OF LIFE – SECONDARY FENCE BOARD – OPTION A<br>(no recycling at the EoL)                                                           |                                               |      |
|---------------------------------------------------------------------------------------------------------------------------------------|-----------------------------------------------|------|
| Ecoinvent dataset ( <a href="https://ecoinvent.org/database/">https://ecoinvent.org/database/</a> (accessed on 12 February 24))       | Amount                                        | Unit |
| <i>Inputs</i>                                                                                                                         |                                               |      |
| Transport, freight, lorry 7.5-16 metric ton, euro6 {RER}   market for transport, freight, lorry 7.5-16 metric ton, EURO6   Cut-off, U | 2502<br>(Load: 25.025 kg<br>Distance: 100 km) | kgkm |
| <i>Outputs</i>                                                                                                                        |                                               |      |
| Waste polyethylene {RoW}   treatment of waste polyethylene, sanitary landfill   Cut-off, U                                            | 7.45                                          | kg   |
| Waste polyethylene {RoW}   treatment of waste polyethylene, municipal incineration   Cut-off, U                                       | 0.05                                          | kg   |
| Waste polypropylene {RoW}   treatment of waste polypropylene, sanitary landfill   Cut-off, U                                          | 7.45                                          | kg   |
| Waste polypropylene {RoW}   treatment of waste polypropylene, municipal incineration   Cut-off, U                                     | 0.05                                          | kg   |
| Waste plastic, mixture {RoW}   treatment of waste plastic, mixture, sanitary landfill   Cut-off, U                                    | 2.483                                         | kg   |
| Waste plastic, mixture {RoW}   treatment of waste plastic, mixture, municipal incineration   Cut-off, U                               | 0.017                                         | kg   |
| Waste plastic, mixture {RoW}   treatment of waste plastic, mixture, sanitary landfill   Cut-off, U                                    | 2.483                                         | kg   |
| Waste plastic, mixture {RoW}   treatment of waste plastic, mixture, municipal incineration   Cut-off, U                               | 0.017                                         | kg   |
| Waste plastic, mixture {RoW}   treatment of waste plastic, mixture, sanitary landfill   Cut-off, U                                    | 2.483                                         | kg   |
| Waste plastic, mixture {RoW}   treatment of waste plastic, mixture, municipal incineration   Cut-off, U                               | 0.017                                         | kg   |
| Waste aluminium {RoW}   treatment of, sanitary landfill   Cut-off, U                                                                  | 2.483                                         | kg   |



|                                                                                                                                      |                                               |      |
|--------------------------------------------------------------------------------------------------------------------------------------|-----------------------------------------------|------|
| Scrap aluminium {Europe without Switzerland}  treatment of scrap aluminium, municipal incineration   Cut-off, U                      | 0.017                                         | kg   |
| Total Production of secondary garden pots (Recycling process II):                                                                    | n.a.                                          |      |
| Total credited primary production:                                                                                                   | n.a                                           |      |
| Total landfilling:                                                                                                                   | 24.75                                         | kg   |
| Total incineration:                                                                                                                  | 0.245                                         | kg   |
| END OF LIFE – SECONDARY FENCE BOARD – OPTION B<br>(primary production of market HDPE pots credited)                                  |                                               |      |
| Inputs                                                                                                                               |                                               |      |
| Transport, freight, lorry 7.5-16 metric ton, euro6 {RER}  market for transport, freight, lorry 7.5-16 metric ton, EURO6   Cut-off, U | 2502<br>(Load: 25.025 kg<br>Distance: 100 km) | kgkm |
| Production of secondary garden pots (Recycling process II)                                                                           | 12.48                                         | kg   |
| Polyethylene, high density, granulate {GLO}  market for   Cut-off, U<br>(credit)                                                     | -2.43                                         | kg   |
| Blow moulding {GLO}  market for   Cut-off, U (credit)                                                                                |                                               |      |
| Outputs                                                                                                                              |                                               |      |
| Waste polyethylene {RoW}  treatment of waste polyethylene, sanitary landfill   Cut-off, U                                            | 3.7125                                        | kg   |
| Waste polyethylene {RoW}  treatment of waste polyethylene, municipal incineration   Cut-off, U                                       | 0.0375                                        | kg   |
| Waste polypropylene {RoW}  treatment of waste polypropylene, sanitary landfill   Cut-off, U                                          | 3.7125                                        | kg   |
| Waste polypropylene {RoW}  treatment of waste polypropylene, municipal incineration   Cut-off, U                                     | 0.0375                                        | kg   |
| Waste plastic, mixture {RoW}  treatment of waste plastic, mixture, sanitary landfill   Cut-off, U                                    | 1.2375                                        | kg   |
| Waste plastic, mixture {RoW}  treatment of waste plastic, mixture, municipal incineration   Cut-off, U                               | 0.0125                                        | kg   |
| Waste plastic, mixture {RoW}  treatment of waste plastic, mixture, sanitary landfill   Cut-off, U                                    | 1.2375                                        | kg   |
| Waste plastic, mixture {RoW}  treatment of waste plastic, mixture, municipal incineration   Cut-off, U                               | 0.0125                                        | kg   |
| Waste plastic, mixture {RoW}  treatment of waste plastic, mixture, sanitary landfill   Cut-off, U                                    | 1.2375                                        | kg   |
| Waste plastic, mixture {RoW}  treatment of waste plastic, mixture, municipal incineration   Cut-off, U                               | 0.0125                                        | kg   |
| Waste aluminium {RoW}  treatment of, sanitary landfill   Cut-off, U                                                                  | 1.2375                                        | kg   |
| Scrap aluminium {Europe without Switzerland}  treatment of scrap aluminium, municipal incineration   Cut-off, U                      | 0.0125                                        | kg   |
| Total Production of secondary garden pots (Recycling process II):                                                                    | 12.48                                         | kg   |
| Total credited primary production:                                                                                                   | -2.43                                         | kg   |
| Total landfilling:                                                                                                                   | 12.375                                        | kg   |
| Total incineration:                                                                                                                  | 0.125                                         | kg   |

| END OF LIFE – SECONDARY FENCE BOARD – OPTION C<br>(primary production of market pots credited, materials mix, equal durability of pots)                         |                                               |      |
|-----------------------------------------------------------------------------------------------------------------------------------------------------------------|-----------------------------------------------|------|
| <i>Inputs</i>                                                                                                                                                   |                                               |      |
| Transport, freight, lorry 7.5-16 metric ton, euro6 {RER}   market for transport, freight, lorry 7.5-16 metric ton, EURO6   Cut-off, U                           | 2502<br>(Load: 25.025 kg<br>Distance: 100 km) | kgkm |
| Production of secondary garden pots (Recycling process II)                                                                                                      | 12.48                                         | kg   |
| Ceramic tile {GLO}   market for   Cut-off, U (credit)                                                                                                           | -1.18                                         | kg   |
| Concrete roof tile {GLO}   market for   Cut-off, U (credit)                                                                                                     | -1.18                                         | kg   |
| Polyethylene, high density, granulate {GLO}   market for   Cut-off, U (credit)                                                                                  | -0.74                                         | kg   |
| Blow moulding {GLO}   market for   Cut-off, U (credit)                                                                                                          | -2.58                                         | kg   |
| Steel, low-alloyed {GLO}   market for   Cut-off, U (credit)                                                                                                     |                                               |      |
| Hot rolling, steel {GLO}   market for   Cut-off, U (credit)                                                                                                     |                                               |      |
| Sawnwood, beam, softwood, dried (u=10%), planed {Europe without Switzerland}   market for sawnwood, beam, softwood, dried (u=10%), planed   Cut-off, U (credit) | -0.0002                                       | m3   |
| <i>Outputs</i>                                                                                                                                                  |                                               |      |
| Waste polyethylene {RoW}   treatment of waste polyethylene, sanitary landfill   Cut-off, U                                                                      | 3.7125                                        | kg   |
| Waste polyethylene {RoW}   treatment of waste polyethylene, municipal incineration   Cut-off, U                                                                 | 0.0375                                        | kg   |
| Waste polypropylene {RoW}   treatment of waste polypropylene, sanitary landfill   Cut-off, U                                                                    | 3.7125                                        | kg   |
| Waste polypropylene {RoW}   treatment of waste polypropylene, municipal incineration   Cut-off, U                                                               | 0.0375                                        | kg   |
| Waste plastic, mixture {RoW}   treatment of waste plastic, mixture, sanitary landfill   Cut-off, U                                                              | 1.2375                                        | kg   |
| Waste plastic, mixture {RoW}   treatment of waste plastic, mixture, municipal incineration   Cut-off, U                                                         | 0.0125                                        | kg   |
| Waste plastic, mixture {RoW}   treatment of waste plastic, mixture, sanitary landfill   Cut-off, U                                                              | 1.2375                                        | kg   |
| Waste plastic, mixture {RoW}   treatment of waste plastic, mixture, municipal incineration   Cut-off, U                                                         | 0.0125                                        | kg   |
| Waste plastic, mixture {RoW}   treatment of waste plastic, mixture, sanitary landfill   Cut-off, U                                                              | 1.2375                                        | kg   |
| Waste plastic, mixture {RoW}   treatment of waste plastic, mixture, municipal incineration   Cut-off, U                                                         | 0.0125                                        | kg   |
| Waste aluminium {RoW}   treatment of, sanitary landfill   Cut-off, U                                                                                            | 1.2375                                        | kg   |
| Scrap aluminium {Europe without Switzerland}   treatment of scrap aluminium, municipal incineration   Cut-off, U                                                | 0.0125                                        | kg   |
| Total Production of secondary garden pots (Recycling process II):                                                                                               | 12.48                                         | kg   |
| Total credited primary production:                                                                                                                              | -5.84                                         | kg   |
| Total landfilling:                                                                                                                                              | 12.375                                        | kg   |
| Total incineration:                                                                                                                                             | 0.125                                         | kg   |

| END OF LIFE – SECONDARY FENCE BOARD – OPTION D<br>(primary production of market pots credited, materials mix, different durability of pots)                     |                                               |      |
|-----------------------------------------------------------------------------------------------------------------------------------------------------------------|-----------------------------------------------|------|
| <i>Inputs</i>                                                                                                                                                   |                                               |      |
| Transport, freight, lorry 7.5-16 metric ton, euro6 {RER}   market for transport, freight, lorry 7.5-16 metric ton, EURO6   Cut-off, U                           | 2502<br>(Load: 25.025 kg<br>Distance: 100 km) | kgkm |
| Production of secondary garden pots (Recycling process II)                                                                                                      | 12.48                                         | kg   |
| Ceramic tile {GLO}   market for   Cut-off, U (credit)                                                                                                           | -0.59                                         | kg   |
| Concrete roof tile {GLO}   market for   Cut-off, U (credit)                                                                                                     | -0.59                                         | kg   |
| Polyethylene, high density, granulate {GLO}   market for   Cut-off, U (credit)                                                                                  | -0.74                                         | kg   |
| Blow moulding {GLO}   market for   Cut-off, U (credit)                                                                                                          | -1.29                                         | kg   |
| Steel, low-alloyed {GLO}   market for   Cut-off, U (credit)                                                                                                     |                                               |      |
| Hot rolling, steel {GLO}   market for   Cut-off, U (credit)                                                                                                     |                                               |      |
| Sawnwood, beam, softwood, dried (u=10%), planed {Europe without Switzerland}   market for sawnwood, beam, softwood, dried (u=10%), planed   Cut-off, U (credit) | -0.000013                                     | m3   |
| <i>Outputs</i>                                                                                                                                                  |                                               |      |
| Waste polyethylene {RoW}   treatment of waste polyethylene, sanitary landfill   Cut-off, U                                                                      | 3.7125                                        | kg   |
| Waste polyethylene {RoW}   treatment of waste polyethylene, municipal incineration   Cut-off, U                                                                 | 0.0375                                        | kg   |
| Waste polypropylene {RoW}   treatment of waste polypropylene, sanitary landfill   Cut-off, U                                                                    | 3.7125                                        | kg   |
| Waste polypropylene {RoW}   treatment of waste polypropylene, municipal incineration   Cut-off, U                                                               | 0.0375                                        | kg   |
| Waste plastic, mixture {RoW}   treatment of waste plastic, mixture, sanitary landfill   Cut-off, U                                                              | 1.2375                                        | kg   |
| Waste plastic, mixture {RoW}   treatment of waste plastic, mixture, municipal incineration   Cut-off, U                                                         | 0.0125                                        | kg   |
| Waste plastic, mixture {RoW}   treatment of waste plastic, mixture, sanitary landfill   Cut-off, U                                                              | 1.2375                                        | kg   |
| Waste plastic, mixture {RoW}   treatment of waste plastic, mixture, municipal incineration   Cut-off, U                                                         | 0.0125                                        | kg   |
| Waste plastic, mixture {RoW}   treatment of waste plastic, mixture, sanitary landfill   Cut-off, U                                                              | 1.2375                                        | kg   |
| Waste plastic, mixture {RoW}   treatment of waste plastic, mixture, municipal incineration   Cut-off, U                                                         | 0.0125                                        | kg   |
| Waste aluminium {RoW}   treatment of, sanitary landfill   Cut-off, U                                                                                            | 1.2375                                        | kg   |
| Scrap aluminium {Europe without Switzerland}   treatment of scrap aluminium, municipal incineration   Cut-off, U                                                | 0.0125                                        | kg   |
| Total Production of secondary garden pots (Recycling process II):                                                                                               | 12.48                                         | kg   |
| Total credited primary production:                                                                                                                              | -3.31                                         | kg   |
| Total landfilling:                                                                                                                                              | 12.375                                        | kg   |
| Total incineration:                                                                                                                                             | 0.125                                         | kg   |

Source: own elaboration based in calculations SimaPro software

**Table S11** The environmental impact (single score) and results of identification of the most relevant impact categories and life cycle stages – scenarios 4C (the best), 4B, 4D, 4A, 2C, 2B, 2D and 1C

| SCENARIOS                         | 4C (the best)                                     |       | 4B                                                                        |       | 4D                                                |       | 4A                                                |       | 2C                                                |       | 2B                                                |       | 2D                                                |       | 1C                                                |       |
|-----------------------------------|---------------------------------------------------|-------|---------------------------------------------------------------------------|-------|---------------------------------------------------|-------|---------------------------------------------------|-------|---------------------------------------------------|-------|---------------------------------------------------|-------|---------------------------------------------------|-------|---------------------------------------------------|-------|
|                                   | Life cycle of secondary fence board (scenario 4C) |       | Life cycle of secondary fence board (scenario 4B)                         |       | Life cycle of secondary fence board (scenario 4D) |       | Life cycle of secondary fence board (scenario 4A) |       | Life cycle of secondary fence board (scenario 2C) |       | Life cycle of secondary fence board (scenario 2B) |       | Life cycle of secondary fence board (scenario 2D) |       | Life cycle of secondary fence board (scenario 1C) |       |
|                                   | The total environmental impact (single score)     |       |                                                                           |       |                                                   |       |                                                   |       |                                                   |       |                                                   |       |                                                   |       |                                                   |       |
| Single score [mPt]                | 4.58                                              |       | 5.18                                                                      |       | 5.19                                              |       | 5.71                                              |       | 7.29                                              |       | 7.89                                              |       | 7.90                                              |       | 7.93                                              |       |
|                                   | The most-relevant impact categories               |       |                                                                           |       |                                                   |       |                                                   |       |                                                   |       |                                                   |       |                                                   |       |                                                   |       |
|                                   | ranking                                           | share | ranking                                                                   | share | ranking                                           | share | ranking                                           | share | ranking                                           | share | ranking                                           | share | ranking                                           | share | ranking                                           | share |
| Climate change                    | 1                                                 | 27.9% | 1                                                                         | 25.1% | 1                                                 | 26.4% | 1                                                 | 23.3% | 1                                                 | 27.0% | 1                                                 | 25.2% | 1                                                 | 26.1% | 1                                                 | 30.7% |
| Resource use, fossils             | 4                                                 | 14.6% | 4                                                                         | 11.0% | 3                                                 | 13.9% | 3                                                 | 13.0% | 2                                                 | 20.4% | 2                                                 | 17.5% | 2                                                 | 19.4% | 2                                                 | 23.2% |
| Ecotoxicity, freshwater           | 2                                                 | 15.8% | 2                                                                         | 15.1% | 2                                                 | 14.9% | 2                                                 | 19.5% | 3                                                 | 12.1% | 3                                                 | 11.9% | 3                                                 | 11.7% | 3                                                 | 10.8% |
| Eutrophication, freshwater        | 3                                                 | 15.1% | 3                                                                         | 13.7% | 4                                                 | 13.8% | 4                                                 | 12.3% | 4                                                 | 10.9% | 4                                                 | 10.3% | 4                                                 | 10.4% | 4                                                 | 9.9%  |
| Particulate matter                |                                                   |       | 6                                                                         | 6.8%  |                                                   |       |                                                   |       |                                                   |       | 6                                                 | 6.2%  |                                                   |       |                                                   |       |
| Acidification                     | 5                                                 | 6.8%  | 7                                                                         | 6.1%  | 7                                                 | 6.4%  | 6                                                 | 5.6%  | 6                                                 | 6.3%  |                                                   |       | 6                                                 | 6.0%  | 5                                                 | 7.1%  |
| Resource use, minerals and metals |                                                   |       | 5                                                                         | 7.1%  | 5                                                 | 6.5%  | 5                                                 | 6.8%  | 5                                                 | 9.2%  | 5                                                 | 9.7%  | 5                                                 | 9.3%  |                                                   |       |
|                                   | The most-relevant life cycle stages               |       |                                                                           |       |                                                   |       |                                                   |       |                                                   |       |                                                   |       |                                                   |       |                                                   |       |
| Climate change                    | Materials & production - secondary board          |       | Materials & production - secondary board                                  |       | Materials & production - secondary board          |       | Materials & production - secondary board          |       | Materials & production - secondary board          |       | Materials & production - secondary board          |       | Materials & production - secondary board          |       | Materials & production - secondary board          |       |
| Resource use, fossils             | Materials & production - secondary board          |       | Materials & production - secondary board<br>End of life - secondary board |       | Materials & production - secondary board          |       | Materials & production - secondary board          |       | Materials & production - secondary board          |       | Materials & production - secondary board          |       | Materials & production - secondary board          |       | Materials & production - secondary board          |       |

|                                              |                                                                                       |                                                                                                         |                                                                                                            |                                                                                            |                                                                                          |                                                                                          |                                                                                          |                                                                                    |
|----------------------------------------------|---------------------------------------------------------------------------------------|---------------------------------------------------------------------------------------------------------|------------------------------------------------------------------------------------------------------------|--------------------------------------------------------------------------------------------|------------------------------------------------------------------------------------------|------------------------------------------------------------------------------------------|------------------------------------------------------------------------------------------|------------------------------------------------------------------------------------|
| <b>Ecotoxicity,<br/>freshwater</b>           | Materials &<br>production -<br>secondary board<br>End of life -<br>secondary<br>board | Materials &<br>production -<br>secondary board<br>End of life -<br>secondary<br>board                   | Materials &<br>production -<br>secondary<br>board<br>End of life -<br>secondary<br>board                   | End of life -<br>secondary<br>board.<br>Materials &<br>production -<br>secondary<br>board. | Materials &<br>production -<br>secondary<br>board<br>End of life -<br>secondary<br>board | Materials &<br>production -<br>secondary<br>board<br>End of life -<br>secondary<br>board | Materials &<br>production -<br>secondary<br>board<br>End of life -<br>secondary<br>board | Materials &<br>production -<br>secondary board<br>End of life -<br>secondary board |
| <b>Eutrophication,<br/>freshwater</b>        | Materials &<br>production -<br>secondary board                                        | Materials &<br>production -<br>secondary board                                                          | Materials &<br>production -<br>secondary<br>board                                                          | Materials &<br>production -<br>secondary<br>board                                          | Materials &<br>production -<br>secondary<br>board                                        | Materials &<br>production -<br>secondary<br>board                                        | Materials &<br>production -<br>secondary<br>board                                        | Materials &<br>production -<br>secondary board                                     |
| <b>Particulate matter</b>                    | Materials &<br>production -<br>secondary board                                        | Materials &<br>production -<br>secondary board<br>End of life -<br>secondary<br>board                   |                                                                                                            |                                                                                            |                                                                                          | Materials &<br>production -<br>secondary<br>board<br>End of life -<br>secondary<br>board |                                                                                          | .                                                                                  |
| <b>Acidification</b>                         | Materials &<br>production -<br>secondary board                                        | Materials &<br>production -<br>secondary board                                                          | Materials &<br>production -<br>secondary<br>board                                                          | Materials &<br>production -<br>secondary<br>board                                          | Materials &<br>production -<br>secondary<br>board                                        |                                                                                          | Materials &<br>production -<br>secondary<br>board                                        | Materials &<br>production -<br>secondary board                                     |
| <b>Resource use,<br/>minerals and metals</b> |                                                                                       | Materials &<br>production -<br>secondary board<br>Materials &<br>production -<br>auxiliary<br>materials | Materials &<br>production -<br>secondary<br>board<br>Materials &<br>production -<br>auxiliary<br>materials | Materials &<br>production -<br>secondary<br>board                                          | Materials &<br>production -<br>secondary<br>board<br>End of life -<br>secondary<br>board | Materials &<br>production -<br>secondary<br>board                                        | Materials &<br>production -<br>secondary<br>board                                        | .                                                                                  |

Source: own elaboration based on calculations in SimaPro software

**Table S12** The environmental impact (single score) and results of identification of the most relevant impact categories and life cycle stages – scenarios 2A, 1B, 1D, 1A (baseline), 3C, 3B, 3D and 3A (the worst)

| SCENARIOS                            | 2A                                                         |       | 1B                                                         |       | 1D                                                         |       | 1A<br>(baseline)                                           |       | 3C                                                         |       | 3B                                                         |       | 3D                                                         |       | 3A (the worst)                                             |       |
|--------------------------------------|------------------------------------------------------------|-------|------------------------------------------------------------|-------|------------------------------------------------------------|-------|------------------------------------------------------------|-------|------------------------------------------------------------|-------|------------------------------------------------------------|-------|------------------------------------------------------------|-------|------------------------------------------------------------|-------|
|                                      | Life cycle of<br>secondary<br>fence board<br>(scenario 2A) |       | Life cycle of<br>secondary<br>fence board<br>(scenario 1B) |       | Life cycle of<br>secondary<br>fence board<br>(scenario 1D) |       | Life cycle of<br>secondary<br>fence board<br>(scenario 1A) |       | Life cycle of<br>secondary<br>fence board<br>(scenario 3C) |       | Life cycle of<br>secondary<br>fence board<br>(scenario 3B) |       | Life cycle of<br>secondary<br>fence board<br>(scenario 3D) |       | Life cycle of<br>secondary<br>fence board<br>(scenario 3A) |       |
|                                      | The total environmental impact (single score)              |       |                                                            |       |                                                            |       |                                                            |       |                                                            |       |                                                            |       |                                                            |       |                                                            |       |
| Single score [mPt]                   | 8.42                                                       |       | 8.52                                                       |       | 8.53                                                       |       | 9.05                                                       |       | 14.36                                                      |       | 14.96                                                      |       | 15.0                                                       |       | 15.48                                                      |       |
|                                      | The most-relevant impact categories                        |       |                                                            |       |                                                            |       |                                                            |       |                                                            |       |                                                            |       |                                                            |       |                                                            |       |
|                                      | ranking                                                    | share |
| Climate change                       | 1                                                          | 24.0% | 1                                                          | 28.8% | 1                                                          | 29.6% | 1                                                          | 27.4% | 1                                                          | 24.1% | 1                                                          | 23.3% | 1                                                          | 23.8% | 1                                                          | 22.7% |
| Resource use, fossils                | 2                                                          | 18.5% | 2                                                          | 20.4% | 2                                                          | 22.2% | 2                                                          | 21.1% | 3                                                          | 12.7% | 3                                                          | 11.5% | 3                                                          | 12.5% | 3                                                          | 12.2% |
| Ecotoxicity, freshwater              | 3                                                          | 15.1% | 3                                                          | 10.8% | 3                                                          | 10.6% | 3                                                          | 13.8% | 2                                                          | 13.2% | 2                                                          | 13.0% | 2                                                          | 12.9% | 2                                                          | 14.7% |
| Eutrophication,<br>freshwater        | 4                                                          | 9.5%  | 4                                                          | 9.5%  | 4                                                          | 9.5%  | 4                                                          | 8.8%  | 5                                                          | 9.5%  | 6                                                          | 9.2%  | 5                                                          | 9.3%  | 5                                                          | 8.8%  |
| Particulate matter                   | 7                                                          |       | 5                                                          | 7.5%  | 6                                                          | 5.3%  | 5                                                          | 6.6%  | 6                                                          | 6.7%  | 5                                                          | 9.2%  | 6                                                          | 8.0%  | 6                                                          | 8.7%  |
| Acidification                        | 6                                                          | 5.5%  | 6                                                          | 6.6%  | 5                                                          | 6.8%  | 6                                                          | 6.3%  |                                                            |       |                                                            |       |                                                            |       |                                                            |       |
| Resource use,<br>minerals and metals | 5                                                          | 9.3%  |                                                            |       |                                                            |       |                                                            |       | 4                                                          | 9.6%  | 4                                                          | 9.9%  | 4                                                          | 9.7%  | 4                                                          | 9.7%  |
| Human toxicity,<br>cancer            |                                                            |       |                                                            |       |                                                            |       |                                                            |       | 7                                                          | 6.3%  | 7                                                          | 6.4%  | 7                                                          | 6.2%  | 7                                                          | 6.2%  |

|                                           | The most-relevant life cycle stages                                       |                                                                           |                                                                           |                                                                           |                                                                           |                                                                           |                                                                           |                                                                           |
|-------------------------------------------|---------------------------------------------------------------------------|---------------------------------------------------------------------------|---------------------------------------------------------------------------|---------------------------------------------------------------------------|---------------------------------------------------------------------------|---------------------------------------------------------------------------|---------------------------------------------------------------------------|---------------------------------------------------------------------------|
| <b>Climate change</b>                     | Materials & production - secondary board                                  |
| <b>Resource use, fossils</b>              | Materials & production - secondary board                                  |
| <b>Ecotoxicity, freshwater</b>            | End of life - secondary board<br>Materials & production - secondary board | Materials & production - secondary board<br>End of life - secondary board | Materials & production - secondary board<br>End of life - secondary board | End of life - secondary board<br>Materials & production - secondary board | Materials & production - secondary board<br>End of life - secondary board | Materials & production - secondary board<br>End of life - secondary board | Materials & production - secondary board<br>End of life - secondary board | Materials & production - secondary board<br>End of life - secondary board |
| <b>Eutrophication, freshwater</b>         | Materials & production - secondary board                                  |
| <b>Particulate matter</b>                 | Materials & production - secondary board                                  | Materials & production - secondary board<br>End of life - secondary board | Materials & production - secondary board<br>End of life - secondary board | Materials & production - secondary board                                  | Materials & production - secondary board<br>End of life - secondary board | Materials & production - secondary board                                  | Materials & production - secondary board                                  | Materials & production - secondary board                                  |
| <b>Acidification</b>                      |                                                                           | Materials & production - secondary board                                  | Materials & production - secondary board                                  | Materials & production - secondary board                                  |                                                                           |                                                                           |                                                                           |                                                                           |
| <b>Resource use, minerals, and metals</b> | Materials & production - secondary board                                  |                                                                           |                                                                           |                                                                           | Materials & production - secondary board                                  |

|                                   |  |  |  |  |                                                   |                                                   |                                                   |                                                |
|-----------------------------------|--|--|--|--|---------------------------------------------------|---------------------------------------------------|---------------------------------------------------|------------------------------------------------|
| <b>Human toxicity,<br/>cancer</b> |  |  |  |  | Materials &<br>production -<br>secondary<br>board | Materials &<br>production -<br>secondary<br>board | Materials &<br>production -<br>secondary<br>board | Materials &<br>production -<br>secondary board |
|-----------------------------------|--|--|--|--|---------------------------------------------------|---------------------------------------------------|---------------------------------------------------|------------------------------------------------|

Source: own elaboration based in calculations SimaPro software
